# Supplementary material
Source: Research Square preprint supplement (doi:10.21203/rs.3.rs-8734968/v1)
Supplement: Supplementary file 1 [file 54f02fc471330e66f17b49df.docx]

**Supplementary File 1**

**Interview Guide (English Version)**

**Title of the Study:**
*The Lived Experience of Spiritual status in Parents of Children with Disabilities*

**1. Introduction to the Interview**

Thank you for agreeing to participate in this study. The purpose of this interview is to explore your lived experience of parenting a child with a disability, with particular attention to spiritual beliefs, hope, trust in God, and how these experiences may influence decisions about future childbearing.

There are no right or wrong answers. We are interested in your personal experiences and perspectives, so just talk about your experience not the facts.
With your permission, this interview will be audio-recorded and kept confidential.

**2. Opening Question**

1. Could you tell me about your experience of parenting your child with a disability?

**3. Main Questions**

1. How has having a child with a disability affected your life emotionally, socially, and spiritually?
2. Can you describe the role of faith or spirituality in your life since your child was born?
3. How has trust in God influenced the way you understand or cope with your child’s condition?
4. What does hope mean to you in this situation?
5. Have spiritual beliefs or religious practices (such as prayer, pilgrimage, reading sacred texts) influenced your emotions or coping? If yes, how?
6. How have your spiritual beliefs influenced your decisions about having another child?
7. Have your beliefs changed over time? If so, how?

**4. Probing Questions (Used When Needed)**

- Could you tell me more about that?
- How did that make you feel?
- What did that experience mean to you?
- Can you give an example?
- How did prayer/pilgrimage influence your emotions?
- What helped you the most during difficult times?

**5. Closing Question**

1. Is there anything else about your experience that you would like to share?

**6. Interview Procedure**

- Interviews were conducted face-to-face (or online, if applicable).
- Written informed consent was obtained before participation.
- Interviews were audio-recorded with participants’ permission.
- Interviews were transcribed verbatim in Persian.
- Identifying information was removed to ensure confidentiality
